# Supplementary material
Source: PubMed Central journal article supplement (PMC7172195)

A

| Virus phylogenetic tree | Test virus -host divergence |                | Test of overall tree co-divergence |                       |
|-------------------------|-----------------------------|----------------|------------------------------------|-----------------------|
|                         | Co-divergences              | Host-switching | P value<br>(No. of cost )          | P value<br>(Copycat ) |
| Full length of genome   | 7                           | 8              | < 0.001                            | < 0.02                |
| Polymerase              | 7-8                         | 8              | < 0.001                            | < 0.02                |
| Core                    | 7                           | 8              | < 0.001                            | < 0.02                |
| Surface                 | 7                           | 8              | < 0.001                            | < 0.02                |

B

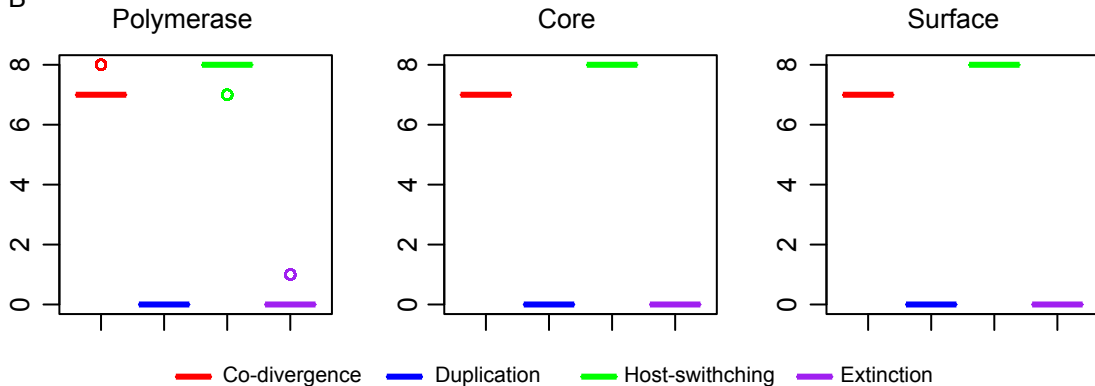

Supplement: mmc1.pdf [file mmc1.pdf]
