# Supplementary material
Source: PubMed Central journal article supplement (PMC7172195)

# Polymerase

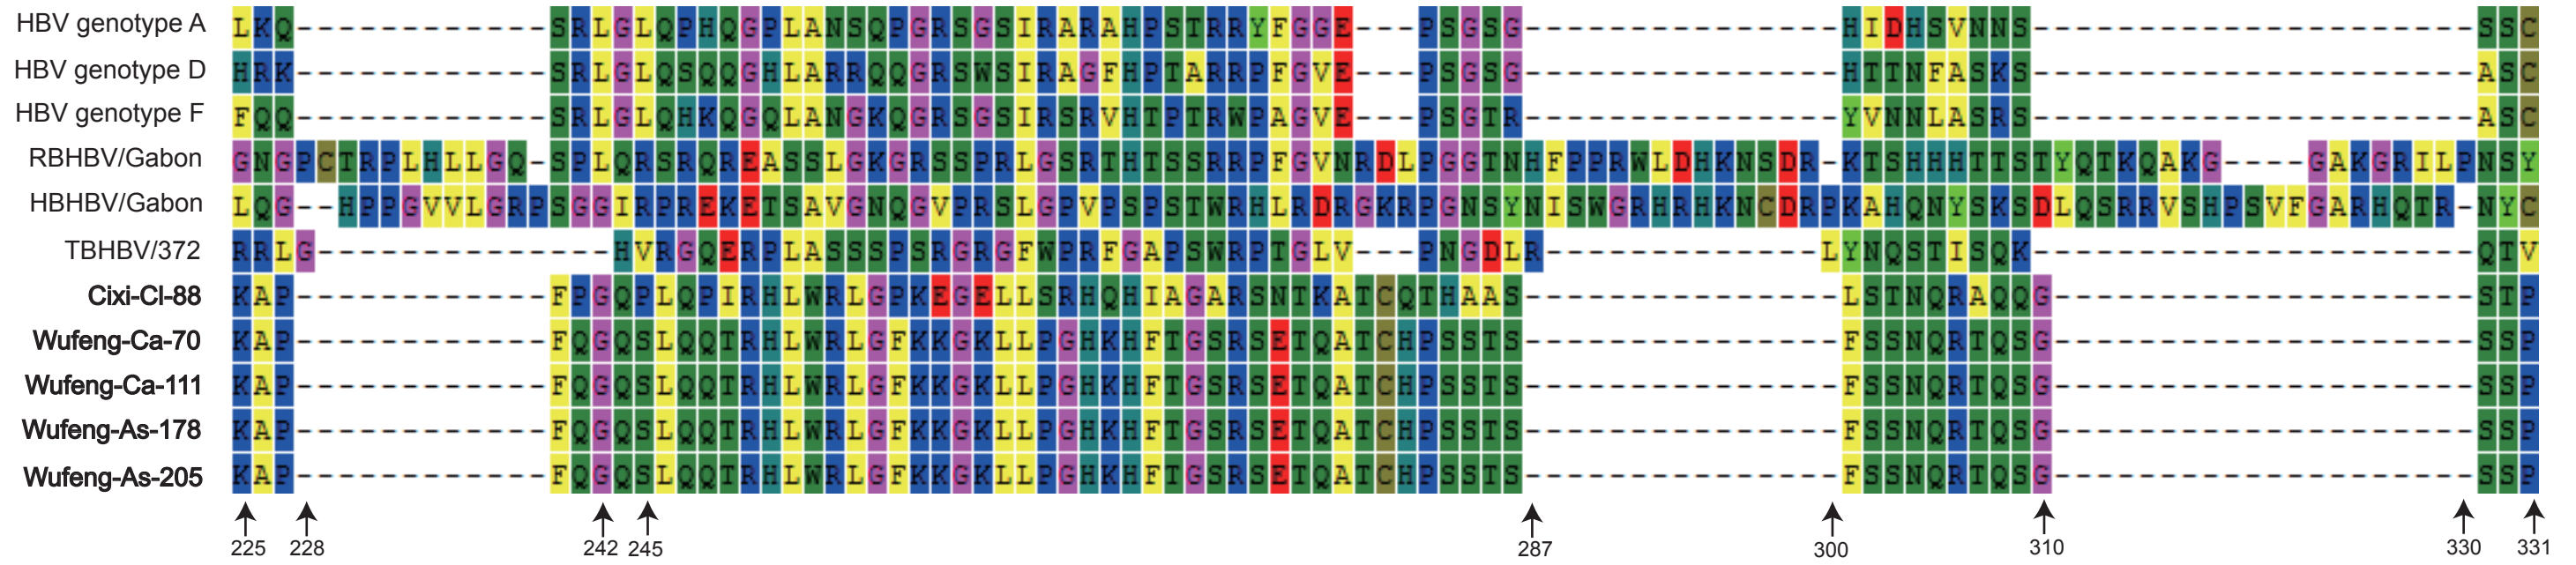

# Surface

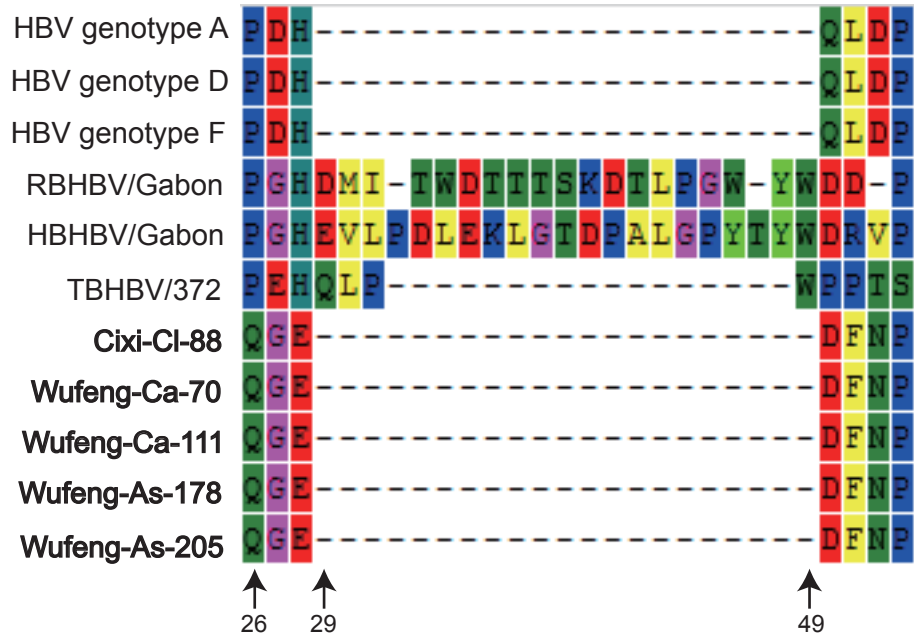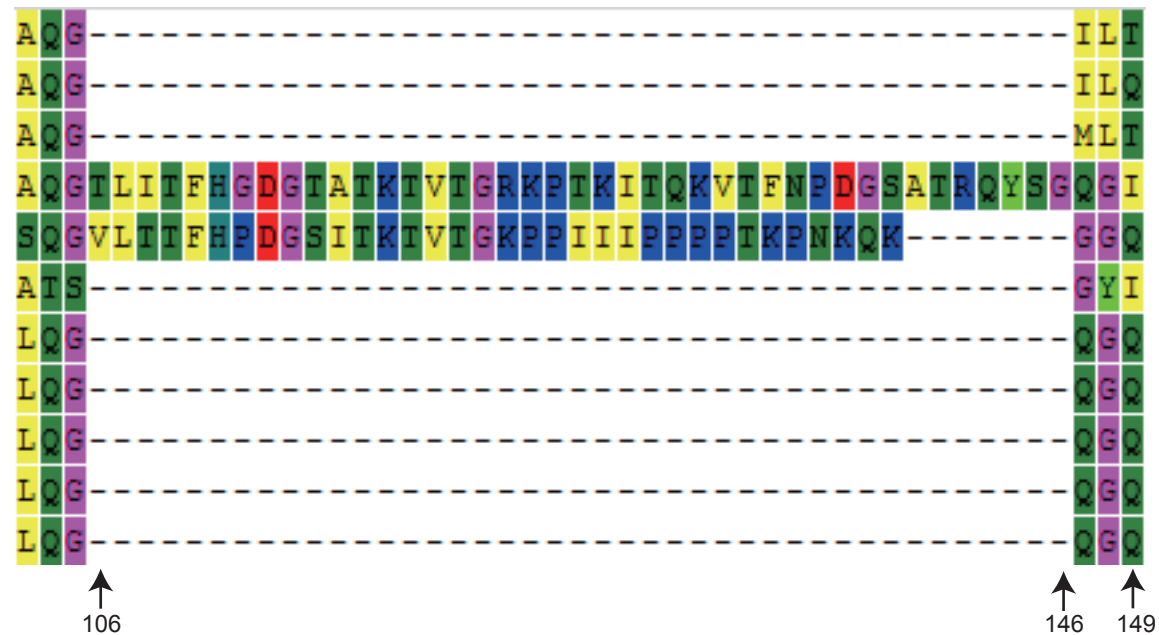

# Core

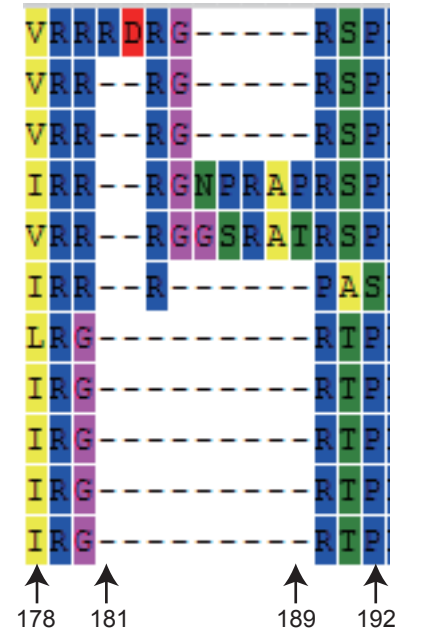

Supplement: mmc2.pdf [file mmc2.pdf]

# Query: Wufeng-Ca-70

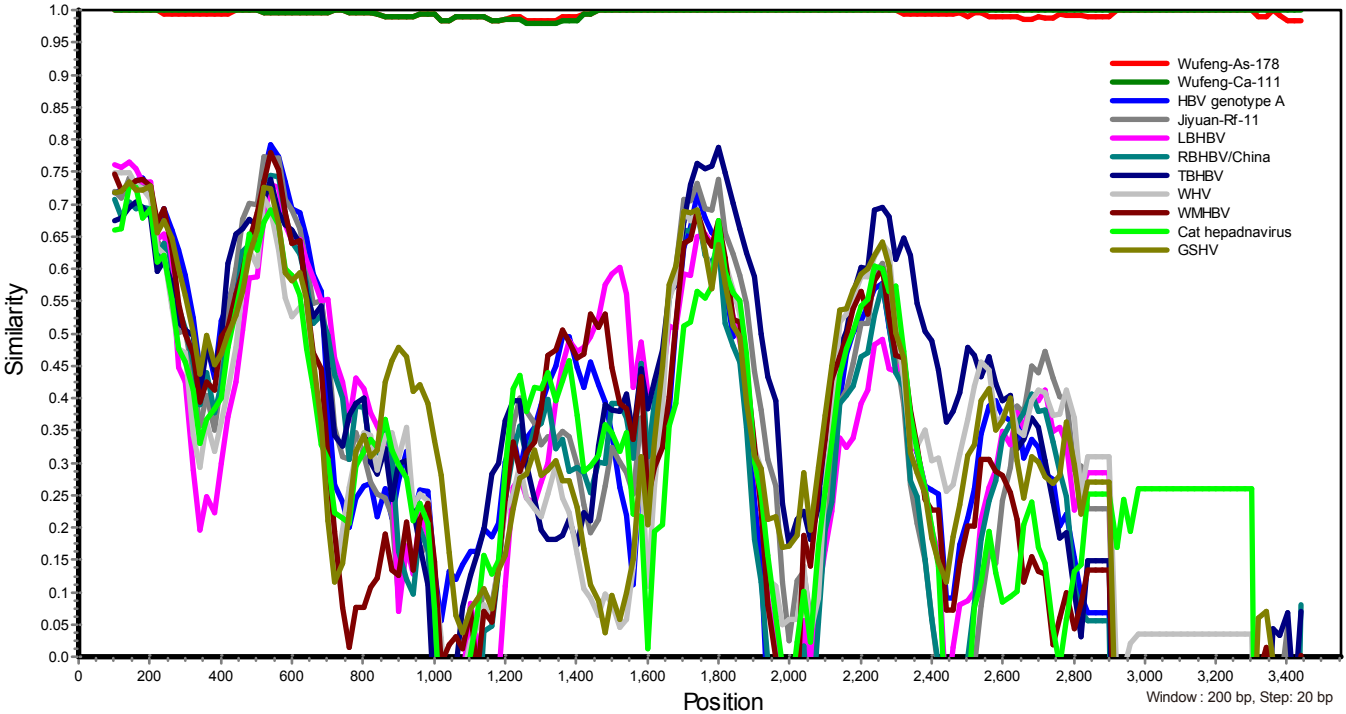

Window : 200 bp, Step: 20 bp

Supplement: mmc4.pdf [file mmc4.pdf]
